# Supplementary material for: Identification of a Metabolism-Related Signature for the Prediction of Survival in Endometrial Cancer Patients
Source: Front Oncol. 2021 Mar 8;11:630905. doi: 10.3389/fonc.2021.630905 (PMC7982602; doi:10.3389/fonc.2021.630905)
Supplement: Supplementary file 8 [file Table_3.xlsx]

## Sheet: venn_result21598
total	Names
61
	CA3
	TK1
	SGPP2
	MTHFD2
	TSTA3
	IDO1
	RDH10
	ADH1B
	GOT1
	PNPLA3
	ASPA
	AKR1B10
	LDHA
	TYRP1
	HNMT
	PFKFB2
	CDO1
	KYNU
	UPP1
	PHGDH
	MIF
	CD38
	IL4I1
	GSTM5
	TDO2
	GMDS
	PSAT1
	TYMS
	PFKFB4
	GNPNAT1
	GPX2
	IDH2
	GAL3ST1
	HK2
	LIPG
	RRM2
	G6PD
	ENPP2
	GPI
	NPL
	CHKA
	CA2
	PGD
	NME1
	GAD1
	ALDOA
	LPCAT1
	ALOX15
	ALAS1
	ALDH3B2
	TYMP
	GGT5
	ANPEP
	EPHX2
	MGST1
	GGCT
	CYP1B1
	HK3
	PNP
	MAT1A
	AACS
40
